# Supplementary material
Source: PubMed Central journal article supplement (PMC8168576)
Supplement: NIHMS1706090-supplement-Supplementary_Tables.pdf [file NIHMS1706090-supplement-Supplementary_Tables.pdf]

**Alcohol Intake in Early Adulthood and Risk of Colorectal Cancer: Three Large Prospective Cohort Studies of Men and Women in the United States**

Jinhee Hur, PhD<sup>1</sup>, Stephanie A. Smith-Warner, PhD<sup>1,2</sup>, Eric B. Rimm, ScD<sup>1-3</sup>, Walter C. Willett, MD, DrPH<sup>1-3</sup>, Kana Wu, MD, PhD<sup>1†</sup>, Yin Cao, ScD, MPH<sup>4,5†</sup>, Edward Giovannucci, MD, ScD<sup>1-3†\*</sup>

<sup>1</sup> Department of Nutrition, Harvard T.H. Chan School of Public Health, Boston, MA, USA

<sup>2</sup> Department of Epidemiology, Harvard T.H. Chan School of Public Health, Boston, MA, USA

<sup>3</sup> Channing Division of Network Medicine, Department of Medicine, Brigham and Women's Hospital and Harvard Medical School, Boston, MA, USA

<sup>4</sup> Division of Public Health Sciences, Department of Surgery, Washington University School of Medicine, St. Louis, MO, USA

<sup>5</sup> Alvin J. Siteman Cancer Center, Washington University School of Medicine, St. Louis, MO, USA

† Contributed equally as senior authors

**Correspondence to:** Edward Giovannucci, MD, ScD, Harvard T.H. Chan School of Public Health, 665 Huntington Ave, Boston, MA 02115, USA (Email: [egiovann@hsph.harvard.edu](mailto:egiovann@hsph.harvard.edu))

**Supplementary Table 1** Distribution of alcohol intake in early adulthood in the NHS, NHSII and HPFS

|              | Alcohol intake in early adulthood, g/day |           |
|--------------|------------------------------------------|-----------|
|              | Mean (standard deviation)                | Range     |
| <b>NHS</b>   | 2.5 (3.6)                                | 0 to 32.0 |
| <b>NHSII</b> | 5.0 (7.9)                                | 0 to 76.8 |
| <b>HPFS</b>  | 4.7 (6.6)                                | 0 to 32.0 |

Abbreviations: HPFS, Health Professionals Follow-Up Study; NHS, Nurses' Health Study; NHSII, Nurses' Health Study II

**Supplementary Table 2** Alcohol intake in early adulthood and risk of colorectal cancer with additional adjustment for risk factors in mid-adulthood<sup>a</sup>

|                                                | Alcohol intake in early adulthood, g/day |                     |                     |                     | <i>P</i> for trend <sup>b</sup> | <i>P</i> for heterogeneity <sup>c</sup> |
|------------------------------------------------|------------------------------------------|---------------------|---------------------|---------------------|---------------------------------|-----------------------------------------|
|                                                | 0                                        | 0.1-4.9             | 5-14.9              | ≥15                 |                                 |                                         |
| <b>Pooled</b>                                  |                                          |                     |                     |                     |                                 |                                         |
| Multivariable model 1 HR (95% CI) <sup>d</sup> | 1                                        | 1.05 (0.94 to 1.18) | 1.07 (0.94 to 1.21) | 1.20 (0.92 to 1.56) | 0.09                            | 0.32                                    |
| Multivariable model 2 HR (95% CI) <sup>e</sup> | 1                                        | 1.07 (0.97 to 1.18) | 1.08 (0.95 to 1.22) | 1.20 (0.92 to 1.57) | 0.08                            | 0.39                                    |
| <b>NHS</b>                                     |                                          |                     |                     |                     |                                 |                                         |
| Multivariable model 1 HR (95% CI) <sup>d</sup> | 1                                        | 1.10 (0.97 to 1.25) | 1.17 (0.96 to 1.41) | 1.71 (0.90 to 3.22) | 0.02                            |                                         |
| Multivariable model 2 HR (95% CI) <sup>e</sup> | 1                                        | 1.11 (0.98 to 1.25) | 1.16 (0.96 to 1.40) | 1.61 (0.85 to 3.05) | 0.04                            |                                         |
| <b>NHSII</b>                                   |                                          |                     |                     |                     |                                 |                                         |
| Multivariable model 1 HR (95% CI) <sup>d</sup> | 1                                        | 1.17 (0.88 to 1.55) | 1.02 (0.76 to 1.36) | 1.30 (0.72 to 2.36) | 0.63                            |                                         |
| Multivariable model 2 HR (95% CI) <sup>e</sup> | 1                                        | 1.18 (0.89 to 1.57) | 1.04 (0.77 to 1.39) | 1.37 (0.76 to 2.49) | 0.52                            |                                         |
| <b>HPFS</b>                                    |                                          |                     |                     |                     |                                 |                                         |
| Multivariable model 1 HR (95% CI) <sup>d</sup> | 1                                        | 0.95 (0.82 to 1.11) | 1.00 (0.81 to 1.22) | 1.06 (0.76 to 1.47) | 0.58                            |                                         |
| Multivariable model 2 HR (95% CI) <sup>e</sup> | 1                                        | 0.98 (0.84 to 1.14) | 1.01 (0.82 to 1.23) | 1.06 (0.76 to 1.49) | 0.62                            |                                         |

Abbreviations: CI, confidence interval; HPFS, Health Professionals Follow-Up Study; HR, hazard ratio; NHS, Nurses' Health Study; NHSII, Nurses' Health Study II

<sup>a</sup> Covariates listed in the footnote of Table 2 were included in models: **race** (white, nonwhite), **height** (continuous), **BMI in early adulthood** (at age 18 for NHS and NHSII; at age 21 for HPFS [continuous]), **pack-years of smoking before age 30** (continuous) and **physical activity at age 18-22** (in metabolic equivalent of task-hours/week for NHSII [continuous]; strenuous physical activity ≥2 times/week, 10-12 months/year for NHS and HPFS [yes, no]).

<sup>b</sup> Test for trend was performed using the median of each category of alcohol intake in early adulthood as a continuous variable.

<sup>c</sup> Cochran's Q test was used to test heterogeneity of the trend across the studies.

<sup>d</sup> Additionally adjusted for **cumulative alcohol intake in mid-adulthood** (continuous).

<sup>e</sup> Additionally adjusted for putative colorectal cancer risk factors in mid-adulthood: **BMI** (continuous), **menopausal status and menopausal hormone use** for NHS and NHSII only (premenopausal, postmenopausal never user, postmenopausal ever user, unknown menopausal status or hormone use), **family history of colorectal cancer** (yes, no), **personal history of diabetes** (yes, no), **pack-years of smoking** (continuous), **physical activity** (continuous), **regular use of aspirin** (yes, no), **regular use of nonsteroidal anti-inflammatory drugs** (yes, no), **current use of multivitamins** (yes, no), **intake of total calories, red and processed meat, dietary fiber, total folate [from foods and supplements] and total calcium** (all continuous), **Alternative Healthy Eating Index-2010 score without alcohol** (continuous) and **lower endoscopy due to screening** (yes, no) or **for other indications within the past 10 years** (yes, no).

**Supplementary Table 3** Joint association of alcohol and cigarette use in early adulthood with risk of colorectal cancer

|                                                | Alcohol and cigarette use in early adulthood |                                           |                                         |                                         |                                         |
|------------------------------------------------|----------------------------------------------|-------------------------------------------|-----------------------------------------|-----------------------------------------|-----------------------------------------|
|                                                | <1 g/day of alcohol &<br><5 pack-years       | 1-<15 g/day of alcohol &<br><5 pack-years | ≥15 g/day of alcohol &<br><5 pack-years | <15 g/day of alcohol &<br>≥5 pack-years | ≥15 g/day of alcohol &<br>≥5 pack-years |
| <b>Pooled</b>                                  |                                              |                                           |                                         |                                         |                                         |
| Age-adjusted HR (95% CI)                       | 1                                            | 1.06 (0.95 to 1.19)                       | 1.59 (1.08 to 2.33)                     | 1.27 (1.10 to 1.46)                     | 1.38 (1.01 to 1.90)                     |
| Multivariable model 1 HR (95% CI) <sup>a</sup> | 1                                            | 1.05 (0.93 to 1.17)                       | 1.53 (1.04 to 2.24)                     | 1.24 (1.08 to 1.43)                     | 1.34 (0.97 to 1.84)                     |
| Multivariable model 2 HR (95% CI) <sup>b</sup> | 1                                            | 1.02 (0.91 to 1.15)                       | 1.45 (0.96 to 2.19)                     | 1.20 (1.03 to 1.39)                     | 1.22 (0.88 to 1.69)                     |
| Multivariable model 3 HR (95% CI) <sup>c</sup> | 1                                            | 1.03 (0.92 to 1.16)                       | 1.40 (0.95 to 2.06)                     | 1.17 (1.04 to 1.32)                     | 1.23 (0.87 to 1.73)                     |
| <b>NHS</b>                                     |                                              |                                           |                                         |                                         |                                         |
| Cases                                          | 410                                          | 377                                       | 5                                       | 460                                     | 5                                       |
| Person-years                                   | 499,007                                      | 483,279                                   | 2,952                                   | 440,654                                 | 4,951                                   |
| Age-adjusted HR (95% CI)                       | 1                                            | 1.11 (0.97 to 1.28)                       | 2.76 (1.13 to 6.70)                     | 1.42 (1.24 to 1.62)                     | 1.72 (0.71 to 4.18)                     |
| Multivariable model 1 HR (95% CI) <sup>a</sup> | 1                                            | 1.10 (0.95 to 1.26)                       | 2.64 (1.09 to 6.44)                     | 1.37 (1.20 to 1.57)                     | 1.58 (0.65 to 3.85)                     |
| Multivariable model 2 HR (95% CI) <sup>b</sup> | 1                                            | 1.09 (0.94 to 1.26)                       | 2.60 (1.07 to 6.34)                     | 1.35 (1.18 to 1.55)                     | 1.56 (0.64 to 3.80)                     |
| Multivariable model 3 HR (95% CI) <sup>c</sup> | 1                                            | 1.09 (0.95 to 1.26)                       | 2.39 (0.98 to 5.83)                     | 1.20 (1.01 to 1.42)                     | 1.31 (0.54 to 3.22)                     |
| <b>NHSII</b>                                   |                                              |                                           |                                         |                                         |                                         |
| Cases                                          | 147                                          | 93                                        | 7                                       | 91                                      | 7                                       |
| Person-years                                   | 938,328                                      | 757,743                                   | 37,572                                  | 541,632                                 | 42,105                                  |
| Age-adjusted HR (95% CI)                       | 1                                            | 0.89 (0.68 to 1.15)                       | 1.51 (0.70 to 3.24)                     | 1.07 (0.82 to 1.39)                     | 1.19 (0.56 to 2.55)                     |
| Multivariable model 1 HR (95% CI) <sup>a</sup> | 1                                            | 0.87 (0.66 to 1.13)                       | 1.40 (0.65 to 3.01)                     | 1.03 (0.79 to 1.35)                     | 1.10 (0.51 to 2.36)                     |
| Multivariable model 2 HR (95% CI) <sup>b</sup> | 1                                            | 0.85 (0.65 to 1.12)                       | 1.35 (0.63 to 2.94)                     | 1.01 (0.77 to 1.33)                     | 1.07 (0.49 to 2.31)                     |
| Multivariable model 3 HR (95% CI) <sup>c</sup> | 1                                            | 0.86 (0.66 to 1.13)                       | 1.40 (0.65 to 3.05)                     | 0.92 (0.62 to 1.36)                     | 1.00 (0.44 to 2.29)                     |
| <b>HPFS</b>                                    |                                              |                                           |                                         |                                         |                                         |
| Cases                                          | 307                                          | 208                                       | 16                                      | 461                                     | 30                                      |
| Person-years                                   | 252,529                                      | 197,438                                   | 14,593                                  | 295,543                                 | 23,286                                  |
| Age-adjusted HR (95% CI)                       | 1                                            | 1.08 (0.90 to 1.30)                       | 1.35 (0.81 to 2.26)                     | 1.23 (1.06 to 1.42)                     | 1.38 (0.94 to 2.02)                     |
| Multivariable model 1 HR (95% CI) <sup>a</sup> | 1                                            | 1.07 (0.90 to 1.29)                       | 1.32 (0.79 to 2.21)                     | 1.23 (1.06 to 1.42)                     | 1.36 (0.93 to 1.99)                     |
| Multivariable model 2 HR (95% CI) <sup>b</sup> | 1                                            | 1.02 (0.85 to 1.23)                       | 1.20 (0.72 to 2.01)                     | 1.15 (0.99 to 1.34)                     | 1.21 (0.82 to 1.78)                     |
| Multivariable model 3 HR (95% CI) <sup>c</sup> | 1                                            | 1.04 (0.87 to 1.25)                       | 1.17 (0.70 to 1.96)                     | 1.20 (0.99 to 1.47)                     | 1.27 (0.84 to 1.93)                     |

Abbreviations: CI, confidence interval; HPFS, Health Professionals Follow-Up Study; HR, hazard ratio; NHS, Nurses' Health Study; NHSII, Nurses' Health Study II

<sup>a</sup> Additionally adjusted for **race** (white, nonwhite), **height** (continuous), **BMI in early adulthood** (at age 18 for NHS and NHSII; at age 21 for HPFS [continuous]) and **physical activity at age 18-22** (in metabolic equivalent of task-hours/week for NHSII [continuous]; strenuous physical activity ≥2 times/week, 10-12 months/year for NHS and HPFS [yes, no]).

<sup>b</sup> Additionally adjusted for **cumulative alcohol intake in mid-adulthood** (continuous).

<sup>c</sup> Additionally adjusted for putative colorectal cancer risk factors in mid-adulthood: **BMI** (continuous), **menopausal status and menopausal hormone use** for NHS and NHSII only (premenopausal, postmenopausal never user, postmenopausal ever user, unknown menopausal status or hormone use), **family history of colorectal cancer** (yes, no), **personal history of diabetes** (yes, no), **pack-years of smoking** (continuous), **physical activity** (continuous), **regular use of aspirin** (yes, no), **regular use of nonsteroidal anti-inflammatory drugs** (yes, no), **current use of multivitamins** (yes, no), **intake of total calories, red and processed meat, dietary fiber, total folate [from foods and supplements] and total calcium** (all continuous), **Alternative Healthy Eating Index-2010 score without alcohol** (continuous) and **lower endoscopy due to screening** (yes, no) or **for other indications within the past 10 years** (yes, no).

**Supplementary Table 4** Joint association of alcohol intake in early and mid-adulthood with risk of colorectal cancer

|                                                | Alcohol intake <sup>a</sup> |                                               |                                                |                                                |                                                 |
|------------------------------------------------|-----------------------------|-----------------------------------------------|------------------------------------------------|------------------------------------------------|-------------------------------------------------|
|                                                | None in both life stages    | Low in early adulthood & low in mid-adulthood | High in early adulthood & low in mid-adulthood | Low in early adulthood & high in mid-adulthood | High in early adulthood & high in mid-adulthood |
| <b>Pooled</b>                                  |                             |                                               |                                                |                                                |                                                 |
| Age-adjusted HR (95% CI)                       | 1                           | 1.10 (0.99 to 1.22)                           | 1.50 (1.09 to 2.05)                            | 1.34 (1.17 to 1.53)                            | 1.46 (0.97 to 2.22)                             |
| Multivariable model 1 HR (95% CI) <sup>b</sup> | 1                           | 1.06 (0.96 to 1.18)                           | 1.35 (0.98 to 1.86)                            | 1.27 (1.11 to 1.46)                            | 1.35 (0.89 to 2.05)                             |
| Multivariable model 2 HR (95% CI) <sup>c</sup> | 1                           | 1.11 (1.00 to 1.23)                           | 1.39 (1.01 to 1.92)                            | 1.32 (1.14 to 1.53)                            | 1.39 (0.91 to 2.13)                             |
| <b>NHS</b>                                     |                             |                                               |                                                |                                                |                                                 |
| Cases                                          | 276                         | 807                                           | 8                                              | 164                                            | 2                                               |
| Person-years                                   | 333,772                     | 935,244                                       | 6,556                                          | 153,924                                        | 1,347                                           |
| Age-adjusted HR (95% CI)                       | 1                           | 1.17 (1.02 to 1.34)                           | 1.95 (0.96 to 3.95)                            | 1.35 (1.11 to 1.64)                            | 2.87 (0.71 to 11.6)                             |
| Multivariable model 1 HR (95% CI) <sup>b</sup> | 1                           | 1.12 (0.97 to 1.28)                           | 1.66 (0.81 to 3.38)                            | 1.27 (1.04 to 1.55)                            | 2.47 (0.61 to 10.1)                             |
| Multivariable model 2 HR (95% CI) <sup>c</sup> | 1                           | 1.15 (1.00 to 1.33)                           | 1.58 (0.78 to 3.24)                            | 1.30 (1.05 to 1.61)                            | 2.51 (0.61 to 10.2)                             |
| <b>NHSII</b>                                   |                             |                                               |                                                |                                                |                                                 |
| Cases                                          | 102                         | 210                                           | 13                                             | 19                                             | 1                                               |
| Person-years                                   | 671,051                     | 1,477,046                                     | 70,179                                         | 89,605                                         | 9,499                                           |
| Age-adjusted HR (95% CI)                       | 1                           | 0.95 (0.74 to 1.20)                           | 1.40 (0.78 to 2.51)                            | 1.17 (0.72 to 1.92)                            | 0.75 (0.10 to 5.41)                             |
| Multivariable model 1 HR (95% CI) <sup>b</sup> | 1                           | 0.91 (0.72 to 1.17)                           | 1.24 (0.68 to 2.26)                            | 1.12 (0.68 to 1.85)                            | 0.69 (0.09 to 4.96)                             |
| Multivariable model 2 HR (95% CI) <sup>c</sup> | 1                           | 0.95 (0.74 to 1.21)                           | 1.32 (0.73 to 2.41)                            | 1.15 (0.69 to 1.94)                            | 0.75 (0.10 to 5.49)                             |
| <b>HPFS</b>                                    |                             |                                               |                                                |                                                |                                                 |
| Cases                                          | 154                         | 527                                           | 23                                             | 295                                            | 23                                              |
| Person-years                                   | 126,891                     | 432,025                                       | 20,480                                         | 186,593                                        | 17,399                                          |
| Age-adjusted HR (95% CI)                       | 1                           | 1.10 (0.91 to 1.31)                           | 1.40 (0.90 to 2.18)                            | 1.35 (1.11 to 1.65)                            | 1.41 (0.91 to 2.21)                             |
| Multivariable model 1 HR (95% CI) <sup>b</sup> | 1                           | 1.07 (0.89 to 1.29)                           | 1.31 (0.83 to 2.05)                            | 1.30 (1.06 to 1.59)                            | 1.31 (0.84 to 2.06)                             |
| Multivariable model 2 HR (95% CI) <sup>c</sup> | 1                           | 1.13 (0.94 to 1.36)                           | 1.36 (0.87 to 2.14)                            | 1.38 (1.11 to 1.71)                            | 1.35 (0.86 to 2.14)                             |

Abbreviations: CI, confidence interval; HPFS, Health Professionals Follow-Up Study; HR, hazard ratio; NHS, Nurses' Health Study; NHSII, Nurses' Health Study II

<sup>a</sup> Alcohol intake of none was defined as <1 g/day, low as <15 g/day and high as ≥15 g/day.

<sup>b</sup> Additionally adjusted for **race** (white, nonwhite), **height** (continuous), **BMI in early adulthood** (at age 18 for NHS and NHSII; at age 21 for HPFS [continuous]), **pack-years of smoking before age 30** (continuous) and **physical activity at age 18-22** (in metabolic equivalent of task-hours/week for NHSII [continuous]; strenuous physical activity ≥2 times/week, 10-12 months/year for NHS and HPFS [yes, no]).

<sup>c</sup> Additionally adjusted for putative colorectal cancer risk factors in mid-adulthood: **BMI** (continuous), **menopausal status and menopausal hormone use** for NHS and NHSII only (premenopausal, postmenopausal never user, postmenopausal ever user, unknown menopausal status or hormone use), **family history of colorectal cancer** (yes, no), **personal history of diabetes** (yes, no), **pack-years of smoking** (continuous), **physical activity** (continuous), **regular use of aspirin** (yes, no), **regular use of nonsteroidal anti-inflammatory drugs** (yes, no), **current use of multivitamins** (yes, no), **intake of total calories, red and processed meat, dietary fiber, total folate [from foods and supplements] and total calcium** (all continuous), **Alternative Healthy Eating Index-2010 score without alcohol** (continuous) and **lower endoscopy due to screening** (yes, no) or **for other indications within the past 10 years** (yes, no).
